# Supplementary material
Source: ML conference proceedings conference paper supplement (https://www.ecva.net/papers/eccv_2020/papers_ECCV/html/123720477_ECCV_2020_paper.php)
Supplement: Supplementary file 1 [file 123720477-supp.pdf]

## 1 Supplementary

### 1.1 Target-to-source Translation

Inspired by image-to-image translation networks [24, 14], existing domain adaptation methods [1, 17, 13] translate images from the source domain to the target domain (source-to-target) to reduce pixel-level domain discrepancy. This is achieved by an unsupervised image translation model  $\mathcal{F}^{-1}$  such as CycleGAN [24] to learn a mapping  $\mathcal{F}^{-1} : \mathcal{X}_s \rightarrow \mathcal{X}_t$ . However, such strategy introduces inevitable bias to the translated images  $\mathcal{F}^{-1}(\mathcal{X}_s)$ , stemming from that  $\mathcal{F}^{-1}(\mathcal{X}_s)$  and  $\mathcal{X}_t$  cannot be guaranteed to follow the exactly identical distribution through the adversarial learning [8]. This problem can get even worse in the source-to-target translation, as  $|\mathcal{X}_s| \gg |\mathcal{X}_t|$  in most of domain adaptation problems. For example, GTA5 [19] (i.e.,  $\mathcal{X}_s$ ) contains 24,966 images, while Cityscapes (i.e.,  $\mathcal{X}_t$ ) [7] has only 2,975 images. As a consequence,  $\mathcal{F}^{-1}(\mathcal{X}_s)$  contains massive amounts of translation bias which will further induces negative effects when adapting domain knowledge between  $\mathcal{F}^{-1}(\mathcal{X}_s)$  and  $\mathcal{X}_t$ . To alleviate this problem, for the first time, we translate images from the target domain to the source domain through the mapping  $\mathcal{F} : \mathcal{X}_t \rightarrow \mathcal{X}_s$  (where  $\mathcal{F}$  is the reverse function of  $\mathcal{F}^{-1}$ ).  $\mathcal{X}_s$  and  $\mathcal{F}(\mathcal{X}_t)$  are then used for further domain knowledge transfer. Doing so significantly reduces the translation bias in the translated images  $\mathcal{F}(\mathcal{X}_t)$  and is much more computationally efficient than the source-to-target translation. Another advantage is that the segmentation network can be trained using original source images  $\mathcal{X}_s$  and their corresponding labels.

### 1.2 Network Architecture

The three multi-scale discriminators (i.e.,  $D_1$ ,  $D_2$ , and  $D_3$ ) used in our reconstruction model follow the identical network architecture. Each of them is a  $70 \times 70$  PatchGAN [10] containing five convolution layers with kernel number  $\{64, 128, 256, 512, 1\}$ . The kernel size for each layer is  $4 \times 4$ . The first three layers use stride 2, while the last two layers with stride 1. A leaky ReLU parameterized by 0.2 is applied to the first four layers. We also apply BatchNorm to each layer, except the first and last one.

### 1.3 Implementation Details

For multi-scale discriminators, Adam optimizer with initial learning rate  $2 \times 10^{-4}$  and momentum  $\{0.5, 0.999\}$  are used in our study. The learning rate is linearly decayed to zero with step size 100.

### 1.4 mIoU Gap

We investigate our model’s ability in narrowing the mIoU gap between the model (Oracle) that is trained in a fully-supervised matter. Compared to existing state-of-the-art methods, we significantly recover the performance loss based

**Table 1.** A performance comparison of our method with other state-of-the-art models on "GTA5 to Cityscapes". The performance is measured by the mIoU gap between each model and the fully-supervised model (Oracle). Two base architectures, i.e., VGG16 (V) and ResNet101 (R) are used in our study.

| <b>GTA5 <math>\rightarrow</math> Cityscapes</b> |      |               |        |
|-------------------------------------------------|------|---------------|--------|
|                                                 | Base | mIoU Gap      | Oracle |
| Source only                                     | R    | -28.5         | 65.1   |
| SIBAN [15]                                      | R    | -22.5         | 65.1   |
| CLAN [16]                                       | R    | -21.9         | 65.1   |
| DISE [2]                                        | R    | -19.7         | 65.1   |
| IntraDA [18]                                    | R    | -18.8         | 65.1   |
| BDL [13]                                        | R    | -16.6         | 65.1   |
| CrCDA [9]                                       | R    | -16.5         | 65.1   |
| SIM [22]                                        | R    | -15.9         | 65.1   |
| Kim et al. [11]                                 | R    | -14.9         | 65.1   |
| FDA-MBT [23]                                    | R    | <b>-14.65</b> | 65.1   |
| Ours                                            | R    | -15.6         | 65.1   |
| Source only                                     | V    | -46.7         | 64.6   |
| SIBAN [15]                                      | V    | -26.1         | 60.3   |
| ASN [20]                                        | V    | -25.2         | 61.8   |
| CyCADA [1]                                      | V    | -24.9         | 60.3   |
| CLAN [16]                                       | V    | -23.7         | 60.3   |
| CrDoCo [5]                                      | V    | -22.2         | 60.3   |
| CrCDA [9]                                       | V    | -22.7         | 61.8   |
| BDL [13]                                        | V    | -19.0         | 60.3   |
| FDA-MBT [23]                                    | V    | -18.1         | 60.3   |
| Kim et al. [11]                                 | V    | -18.0         | 60.3   |
| SIM [22]                                        | V    | -17.9         | 60.3   |
| Ours                                            | V    | <b>-16.8</b>  | 60.3   |

on the ResNet101 backbone on GTA5 to Cityscapes. Although we are inferior to [11, 23] which are published simultaneously with our work, we outperforms these two methods on VGG16-based backbone by a large margin (Table 1). Similar improvements can also be observed on the adaptation from SYNTHIA to Cityscapes as shown in Table 2.

### 1.5 Qualitative Comparison

**GTA5  $\rightarrow$  Cityscapes** As shown in Figure 1, we present the qualitative comparison in Cityscapes based on the VGG16 model from GTA5 $\rightarrow$ Cityscapes. Our results reveal the effectiveness of target-to-source translation and joint distribution alignment in adapting cross-domain knowledge.

**SYNTHIA  $\rightarrow$  Cityscapes** The qualitative comparison for ResNet101 and VGG16 model from SYNTHIA $\rightarrow$ Cityscapes are showcased in Figure 2 and Figure 3, respectively. Similarly, each component in our framework contributes to the overall performance improvement.

**Table 2.** A performance comparison of our method with other state-of-the-art models on "SYNTHIA to Cityscapes". The performance is measured by the mIoU gap between each model and the fully-supervised model (Oracle). Two base architectures, i.e., VGG16 (V) and ResNet101 (R) are used in our study.

| SYNTHIA → Cityscapes |      |              |        |
|----------------------|------|--------------|--------|
|                      | Base | mIoU Gap     | Oracle |
| Source only          | R    | —            | —      |
| ASN [20]             | R    | -25.0        | 71.7   |
| DISE [2]             | R    | -22.9        | 71.7   |
| IntraDA [18]         | R    | -22.8        | 71.7   |
| Kim et al. [11]      | R    | -22.4        | 71.7   |
| DADA [21]            | R    | -21.9        | 71.7   |
| CrCDA [9]            | R    | -21.7        | 71.7   |
| BDL [13]             | R    | -20.3        | 71.7   |
| SIM [22]             | R    | -19.6        | 71.7   |
| FDA-MBT [23]         | R    | -19.2        | 71.7   |
| Ours                 | R    | <b>-18.6</b> | 71.7   |
| CrCDA [9]            | V    | -28.9        | 64.1   |
| ROAD-Net [4]         | V    | -27.6        | 64.1   |
| SPIGAN [12]          | V    | -22.7        | 59.5   |
| GIO-Ada [3]          | V    | -26.8        | 64.1   |
| TGCF-DA [6]          | V    | -25.6        | 64.1   |
| BDL [13]             | V    | -20.5        | 59.5   |
| FDA-MBT [23]         | V    | -19.0        | 59.5   |
| Ours                 | V    | <b>-18.4</b> | 59.5   |

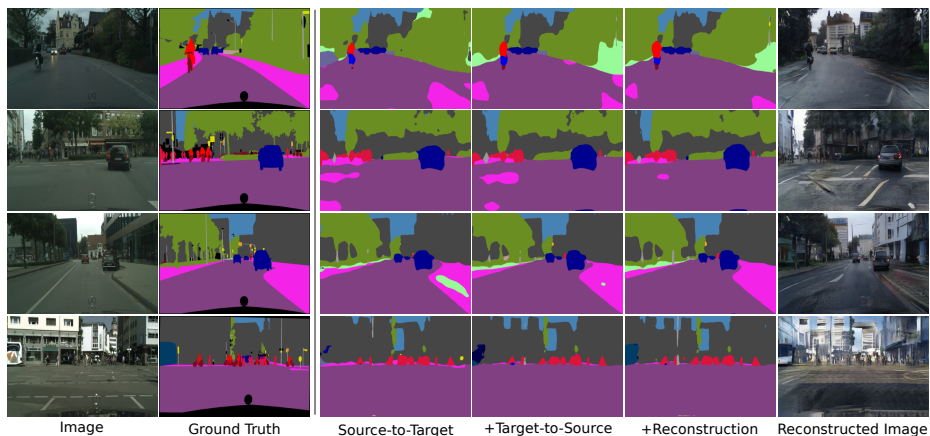

**Fig. 1.** Qualitative examples of semantic segmentation results in Cityscapes (GTA5→Cityscapes with VGG16). For each target-domain image (first column), its ground truth and the corresponding segmentation output from the baseline model (source-to-target) are given. The following are predictions of our method by incorporating target-to-source translation and reconstruction, together with the reconstructed image.

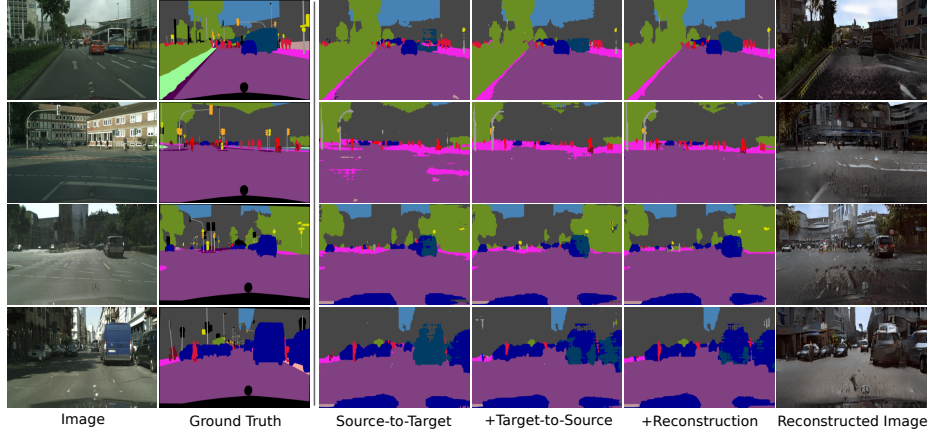

**Fig. 2.** Qualitative examples of semantic segmentation results in Cityscapes (SYNTIA  $\rightarrow$  Cityscapes with ResNet101). For each target-domain image (first column), its ground truth and the corresponding segmentation output from the baseline model (source-to-target) are given. The following are predictions of our method by incorporating target-to-source translation and reconstruction, together with the reconstructed image.

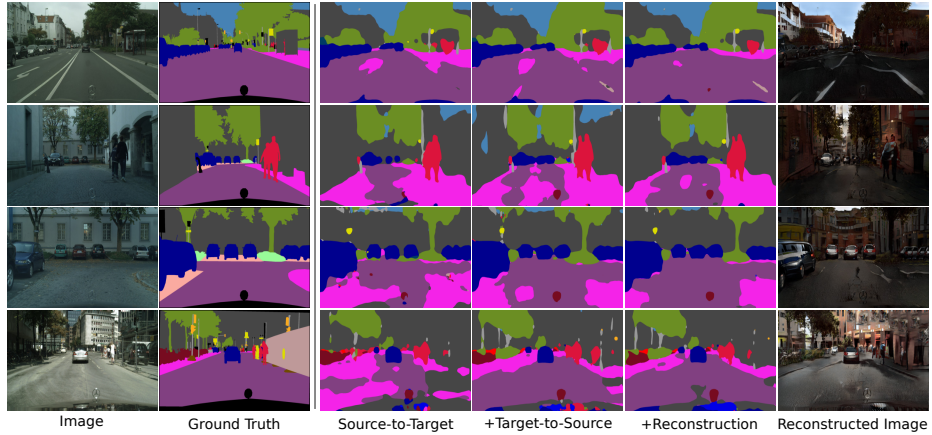

**Fig. 3.** Qualitative examples of semantic segmentation results in Cityscapes (SYNTIA  $\rightarrow$  Cityscapes with VGG16). For each target-domain image (first column), its ground truth and the corresponding segmentation output from the baseline model (source-to-target) are given. The following are predictions of our method by incorporating target-to-source translation and reconstruction, together with the reconstructed image.

## References

1. Cycada: Cycle consistent adversarial domain adaptation. In *International Conference on Machine Learning (ICML)*, 2018.
2. Wei-Lun Chang, Hui-Po Wang, Wen-Hsiao Peng, and Wei-Chen Chiu. All about structure: Adapting structural information across domains for boosting semantic segmentation. In *Proceedings of the IEEE Conference on Computer Vision and Pattern Recognition (CVPR)*, pages 1900–1909, 2019.
3. Yuhua Chen, Wen Li, Xiaoran Chen, and Luc Van Gool. Learning semantic segmentation from synthetic data: A geometrically guided input-output adaptation approach. In *Proceedings of the IEEE Conference on Computer Vision and Pattern Recognition (CVPR)*, pages 1841–1850, 2019.
4. Yuhua Chen, Wen Li, and Luc Van Gool. Road: Reality oriented adaptation for semantic segmentation of urban scenes. In *Proceedings of the IEEE Conference on Computer Vision and Pattern Recognition (CVPR)*, pages 7892–7901, 2018.
5. Yun-Chun Chen, Yen-Yu Lin, Ming-Hsuan Yang, and Jia-Bin Huang. Crdoco: Pixel-level domain transfer with cross-domain consistency. In *Proceedings of the IEEE Conference on Computer Vision and Pattern Recognition (CVPR)*, pages 1791–1800, 2019.
6. Jaehoon Choi, Taekyung Kim, and Changick Kim. Self-ensembling with gan-based data augmentation for domain adaptation in semantic segmentation. In *Proceedings of the IEEE international conference on computer vision (ICCV)*, 2019.
7. Marius Cordts, Mohamed Omran, Sebastian Ramos, Timo Rehfeld, Markus Enzweiler, Rodrigo Benenson, Uwe Franke, Stefan Roth, and Bernt Schiele. The cityscapes dataset for semantic urban scene understanding. In *Proceedings of the IEEE Conference on Computer Vision and Pattern Recognition (CVPR)*, pages 3213–3223, 2016.
8. Ian Goodfellow, Jean Pouget-Abadie, Mehdi Mirza, Bing Xu, David Warde-Farley, Sherjil Ozair, Aaron Courville, and Yoshua Bengio. Generative adversarial nets. In *Advances in neural information processing systems (NIPS)*, pages 2672–2680, 2014.
9. Jiaying Huang, Shijian Lu, Dayan Guan, and Xiaobing Zhang. Contextual-relation consistent domain adaptation for semantic segmentation. *Proceedings of the European Conference on Computer Vision (ECCV)*, 2020.
10. Phillip Isola, Jun-Yan Zhu, Tinghui Zhou, and Alexei A Efros. Image-to-image translation with conditional adversarial networks. In *Proceedings of the IEEE Conference on Computer Vision and Pattern Recognition (CVPR)*, pages 1125–1134, 2017.
11. Myeongjin Kim and Hyeran Byun. Learning texture invariant representation for domain adaptation of semantic segmentation. In *Proceedings of the IEEE/CVF Conference on Computer Vision and Pattern Recognition (CVPR)*, pages 12975–12984, 2020.
12. Kuan-Hui Lee, German Ros, Jie Li, and Adrien Gaidon. Spigan: Privileged adversarial learning from simulation. In *International Conference on Learning Representations (ICLR)*, 2019.
13. Yunsheng Li, Lu Yuan, and Nuno Vasconcelos. Bidirectional learning for domain adaptation of semantic segmentation. In *Proceedings of the IEEE Conference on Computer Vision and Pattern Recognition (CVPR)*, 2019.
14. Ming-Yu Liu, Thomas Breuel, and Jan Kautz. Unsupervised image-to-image translation networks. In *Advances in neural information processing systems (NIPS)*, pages 700–708, 2017.

15. Yawei Luo, Ping Liu, Tao Guan, Junqing Yu, and Yi Yang. Significance-aware information bottleneck for domain adaptive semantic segmentation. In *Proceedings of the IEEE international conference on computer vision (ICCV)*, October 2019.
16. Yawei Luo, Liang Zheng, Tao Guan, Junqing Yu, and Yi Yang. Taking a closer look at domain shift: Category-level adversaries for semantics consistent domain adaptation. In *Proceedings of the IEEE Conference on Computer Vision and Pattern Recognition (CVPR)*, pages 2507–2516, 2019.
17. Zak Murez, Soheil Kolouri, David Kriegman, Ravi Ramamoorthi, and Kyungnam Kim. Image to image translation for domain adaptation. In *Proceedings of the IEEE Conference on Computer Vision and Pattern Recognition (CVPR)*, volume 13, 2018.
18. Fei Pan, Inkyu Shin, Francois Rameau, Seokju Lee, and In So Kweon. Unsupervised intra-domain adaptation for semantic segmentation through self-supervision. In *Proceedings of the IEEE/CVF Conference on Computer Vision and Pattern Recognition (CVPR)*, pages 3764–3773, 2020.
19. Stephan R Richter, Vibhav Vineet, Stefan Roth, and Vladlen Koltun. Playing for data: Ground truth from computer games. In *Proceedings of the European Conference on Computer Vision (ECCV)*, pages 102–118, 2016.
20. Yi-Hsuan Tsai, Wei-Chih Hung, Samuel Schulter, Kihyuk Sohn, Ming-Hsuan Yang, and Manmohan Chandraker. Learning to adapt structured output space for semantic segmentation. In *Proceedings of the IEEE Conference on Computer Vision and Pattern Recognition (CVPR)*, 2018.
21. Tuan-Hung Vu, Himalaya Jain, Maxime Bucher, Matthieu Cord, and Patrick Pérez. Dada: Depth-aware domain adaptation in semantic segmentation. In *Proceedings of the IEEE international conference on computer vision (ICCV)*, 2019.
22. Zhonghao Wang, Mo Yu, Yunchao Wei, Rogerio Feris, Jinjun Xiong, Wen-mei Hwu, Thomas S Huang, and Honghui Shi. Differential treatment for stuff and things: A simple unsupervised domain adaptation method for semantic segmentation. In *Proceedings of the IEEE/CVF Conference on Computer Vision and Pattern Recognition (CVPR)*, pages 12635–12644, 2020.
23. Yanchao Yang and Stefano Soatto. Fda: Fourier domain adaptation for semantic segmentation. In *Proceedings of the IEEE/CVF Conference on Computer Vision and Pattern Recognition (CVPR)*, pages 4085–4095, 2020.
24. Jun-Yan Zhu, Taesung Park, Phillip Isola, and Alexei A Efros. Unpaired image-to-image translation using cycle-consistent adversarial networks. In *Proceedings of the IEEE international conference on computer vision (ICCV)*, 2017.
